# Supplementary material
Source: HighWire-hosted journal article supplement (https://www.cmajopen.ca/highwire/filestream/85465/field_highwire_adjunct_files/1/2020-0211-original-submission.pdf)

# Evaluation of the quality of mammographic breast positioning in Quebec

Julie Rouette MSc<sup>1,2</sup>, Noémie Elfassy MD<sup>3</sup>, Nathaniel Bouganim MD<sup>4</sup>, Nathaniel Lasry PhD<sup>5</sup>,  
Laurent Azoulay PhD<sup>1,2,4</sup>

<sup>1</sup> Department of Epidemiology, Biostatistics and Occupational Health, McGill University,  
Montreal

<sup>2</sup> Centre for Clinical Epidemiology, Lady Davis Institute, Jewish General Hospital, Montreal

<sup>3</sup> Department of Medicine, University of Toronto, Toronto, Canada

<sup>4</sup> Gerald Bronfman Department of Oncology, McGill University, Montreal

<sup>5</sup> iMD Institute for Medical Research, Montreal

**Word count:** 2498

**Running head:** Quality of breast positioning during mammography

**Keywords:** Quality Assurance, Mammography, Positioning

## Correspondence:

Dr. Laurent Azoulay

Centre for Clinical Epidemiology, Lady Davis Institute, Jewish General Hospital

3755 Côte Sainte-Catherine, H-425.1

Montreal, Quebec, Canada, H3T 1E2

Tel: 514.340.8222 extension 28396; Fax: 514.340.7564

Email: [laurent.azoulay@mcgill.ca](mailto:laurent.azoulay@mcgill.ca)

Twitter: [@LaurentAzoulay0](https://twitter.com/LaurentAzoulay0)

August 13, 2020

## ABSTRACT

**Background:** While mammography is a reliable and cost-effective method for breast cancer screening, there are concerns that inadequate breast positioning in mammographic exams may lead to missed cancers. Studies examining the quality of positioning within the Canadian context are limited. Thus, the Ordre des technologues en imagerie médicale, en radio-oncologie et en électrophysiologie médicale du Québec launched a professional inspection among its members to assess the quality of breast positioning in mammographic exams.

**Methods:** This cross-sectional study is based on an inspection conducted between May 2017 and July 2017 among a 15% stratified random sample of all active technologists certified in mammography in Quebec. Each technologist provided 15 consecutive mammographic exams performed in the previous six months. The quality of positioning was then evaluated by senior technologists using a quality assessment tool specifically developed for this inspection. A technologist was deemed to have failed the professional inspection when at least 6 of the 15 mammograms were scored as critical failures.

**Results:** Among 522 technologists certified in mammography in Quebec, 76 technologists were randomly selected for the professional inspection and contributed 1127 mammographic exams. A total of 38 technologists (50.0%, 95% confidence interval 38.3%-61.7%) failed the professional inspection and 491 exams (43.6%) were found to have critical failures.

**Interpretation:** Our findings show that half of the technologists failed the inspection and a significant proportion of mammographic exams had critical failures in breast positioning. These results call for additional training for technologists and an assessment of its impact on breast cancer detection.

## INTRODUCTION

In Canada, breast cancer is the most commonly diagnosed cancer in women and is expected to affect one in eight Canadian women throughout the course of their lifetime.(1) Early detection is paramount to maximizing treatment success and improving patient outcomes. Mammography is currently the most reliable and accepted method for detecting breast cancer but fails to detect between 16% and 30% of breast cancers.(2) Factors such as younger age and higher breast density have been shown to decrease the screening accuracy of mammograms.(2, 3) Improper breast positioning can also decrease the diagnostic sensitivity of the mammogram, potentially leading to unnecessary repeat examinations, higher radiation exposure, unnecessary invasive procedures such as biopsies and surgery, or missed breast cancer cases.(4-7)

There have been increasing concerns regarding the quality of breast positioning.(4, 8-10) In Canada, one small study evaluated the quality of 197 mammograms performed between 2004-2005 as part of the Quebec Breast Cancer Screening Program.(8) Findings showed that 49.7% of mammograms did not satisfy the quality criteria of breast positioning established by the Canadian Association of Radiologists. The paucity of more recent evidence however highlights the need for an updated evaluation of the quality of breast positioning and for the development of a comprehensive and reliable tool that can be effectively used to assess those mammograms.

Thus, the Ordre des technologues en imagerie médicale, en radio-oncologie et en électrophysiologie médicale du Québec launched a professional inspection among its members to assess the quality of breast positioning in mammographic exams. The objective of this study was thus to assess the quality of mammographic positioning in a representative sample of active technologists certified in mammography in the province of Quebec.

## METHODS

### *Study Population*

Between May 2017 and July 2017, at the request of the Ordre des technologues en imagerie médicale, en radio-oncologie et en électrophysiologie médicale du Québec (OTIMROEPMQ), we selected a representative sample of all active, certified medical radiation technologists with accredited training in breast imaging in Quebec in 2017. To select participants for the inspection, we used a stratified sampling strategy which was based on four criteria: 1) geographic location of the centre (urban versus rural); 2) annual volume of mammograms performed in the centre where the technologist practices (low versus high volume, using the median of 2266 as the cut-off); 3) annual number of mammograms performed by the technologist (low versus high, using the median of 709 as the cut-off; and 4) the number of years of experience (<3 years, 3-14 years,  $\geq 15$  years) with or without continuing education.

The stratification procedure prevented over-sampling of the most common individuals, for example technologists working in urban centres. Thus, the stratified sampling generated 48 possible combinations of strata from which one or more technologists were selected at random, to obtain a representative sample size of approximately 15% of all active technologists certified in mammography in Quebec. Tomosynthesis mammograms, single or double mastectomy patient images, and male patients with suspected breast cancer were excluded.

### *Development of the Quality Assessment Tool*

To our knowledge, no reliable tool exists to accurately evaluate the quality of mammographic positioning. Consequently, we created a quality assessment tool with the main objective of limiting subjectivity while also maximizing the inter-rater agreement. We first

1  
2  
3 conducted a review of the scientific literature to establish a list of criteria for quality assessment  
4 in mammographic positioning. We also searched standardized guidelines such as the American  
5  
6 College of Radiology, the Canadian Association of Radiologists, and the European Commission  
7  
8 Initiative on Breast Cancer. We then created an expert panel composed of three technologists  
9  
10 currently providing training in mammography imaging and recommended by their professional  
11  
12 order for their superior expertise in breast imaging. The expert panel independently provided a  
13  
14 set of criteria for the evaluation of the quality of mammographic positioning based on their  
15  
16 professional experience and training. Separate sets of criteria were developed for craniocaudal  
17  
18 (CC) views and mediolateral oblique (MLO) views. We then conducted multiple rounds of pilot  
19  
20 evaluation in which we reviewed each criterion. For the overall quality score, we used a binary  
21  
22 response (adequate vs critical failure) based on the PGMI (Perfect, Good, Moderate, Inadequate)  
23  
24 evaluation system used for quality assurance in mammography in the United Kingdom.(11) To  
25  
26 reduce subjectivity, we predefined the criteria necessary for an image to be evaluated as critical  
27  
28 failure. Details of the pilot evaluation and predefined criteria are provided in **Supplementary**  
29  
30 **Methods 1.**

31  
32  
33 The tool was tested for inter-rater agreement by the expert panel using a first sample of  
34  
35 20 mammograms and a second sample of 32 mammograms, which resulted in a high  
36  
37 concordance rate of 97% (**Supplementary Methods 2** and **Supplementary Tables 1-2**). The  
38  
39 final tool contained eight criteria to evaluate positioning on CC view (**Supplementary Table 3**)  
40  
41 and nine criteria on MLO view (**Supplementary Table 4**).  
42  
43  
44  
45  
46  
47  
48  
49  
50  
51  
52  
53  
54  
55  
56  
57  
58  
59  
60

### *Data Collection and Analysis*

The selected technologists were invited by their professional order to submit 15 consecutive mammograms conducted over a period of six months in 2017. For each mammogram submitted, we used medical records from the mammography clinics to collect the characteristics of the patient (age, weight, height, breast size and density, type of mammography). Characteristics of the technologists (type of training received, annual number of mammograms performed, number of years of experience) were self-reported, and characteristics of the clinics (location, number of patients, center designation, annual number of mammography performed) were obtained from the professional order. For technologists, a passing score was defined as a grade of 60% or more, which consisted of having at least 9 mammograms out of 15 evaluated as adequate. Conversely, failure consisted of having more than 6 mammograms out of 15 evaluated as critical failures.

### *Ethical approval*

The current study did not require approval by an Ethics Committee as this was a professional inspection requested by the professional order of imaging technologists.

## RESULTS

Of the 522 active technologists certified in mammography in Quebec, 76 were randomly selected for the professional inspection through stratified sampling. Sampling was conducted from 27 of those strata, as 21 of the 48 strata did not have active certified technologists. This sample represented 14.6% of all technologists certified in mammography in Quebec and was representative of the population of technologists working in that province.

**Table 1** presents the characteristics of the technologists. The majority of technologists worked in an urban centre (n=68, 89.5%) and a high-volume centre (n=51, 67.1%). About one-fifth of technologists (n=16, 21.1%) completed additional qualifications in mammography imaging. Approximately half of technologists had between 3-14 years of experience in mammography imaging (n=42, 55.3%). Overall, technologists performed a median of 709 mammograms per year (interquartile range 284-1382, maximum 3497).

Each of the 76 selected technologists submitted 15 consecutive mammograms performed in the last six months, which resulted in the submission of 1140 exams. Of those, 13 had missing views or did not meet inclusion criteria, resulting in 1127 evaluable mammograms and their 4508 associated images (a mammogram consists of a sequence of four planar x-rays; one on CC view and one on MLO view for each breast). The characteristics of those 1127 patients and associated mammograms are presented in **Table 2**. A total of 879 mammograms (77.9%) were screening mammograms and 246 (21.8%) were diagnostic mammograms. The mean age of patients was 58.7 years (standard deviation 9.2) and the mean body mass index was 25.3 kg/m<sup>2</sup> (standard deviation 6.8).

### *Quality of Positioning on CC View*

Most technologists (n=63, 83%) obtained a score above the minimum passing grade of 60%, which consisted of having at least 9 CC images out of 15 evaluated as adequate (**Supplementary Figure 1A**). **Table 3** presents the results of the evaluation of positioning on CC view for the 1127 mammograms, which consisted of 1127 right CC images and 1127 left CC images. We also evaluated the proportion of adequate CC images overall because images scored as adequate on the right are not necessarily scored as adequate on the left. The proportion of CC images scored as adequate were 77.8% for the right CC images (n=877) and 81.1% for the left CC images (n=915). A total of 72.5% of mammograms (n=817) had both CC images scored as adequate, which indicates that 27.5% of mammograms were scored as critical failures due to improper positioning on CC view. The most common reasons for a critical failure on CC view were poor visualization of deep tissues (33.6%), portion of breast not included (28.9%), and body-nipple distance larger than 1 cm of the same pectoral-nipple distance measurement on MLO view (23.2%).

### *Quality of Positioning on MLO View*

A total of 80% of technologists (n=61) obtained a score above the passing score of 60% (**Supplementary Figure 1B**). **Table 3** presents the results of the evaluation of positioning on MLO view for the 1127 mammograms, which consisted of 1127 right MLO images and 1127 left MLO images. We also evaluated the proportion of adequate MLO images overall. Similar to the CC results, the proportion of images scored as adequate were 80.0% for the right MLO images (n=902) and 82.4% for the left MLO images (n=929). A total of 74.0% of mammograms (n=834) had both MLO images scored as adequate, which indicates that 26.0% of mammograms were



1  
2  
3 scored as critical failures due to improper positioning on MLO view. The most common reasons  
4  
5 for a critical failure on MLO view were poor visualization (21.3%), portion of breast not  
6  
7 included (19.2%), and infra-mammary fold not well-demonstrated (18.9%).  
8  
9

### 10 11 12 *Overall Quality of Breast Positioning* 13

14  
15 We combined bilateral CC and MLO images to evaluate the overall quality of the  
16  
17 mammogram. For a mammogram to be considered adequate, both CC and MLO images had to  
18  
19 be scored as adequate. A total of 50% of technologists (n=38, 95% confidence interval 38.3%-  
20  
21 61.7%) did not have the minimum number of adequate mammograms, consisting of 9 out of 15  
22  
23 mammograms (**Supplementary Figure 2**). **Table 4** presents the results of the overall quality of  
24  
25 positioning by combining both CC views and MLO views. A total of 56.4% (n=636) of the 1127  
26  
27 mammography exams were evaluated as adequate. However, these results suggest that the  
28  
29 remaining 43.6% of the 1127 mammograms had at least one critical failure in positioning,  
30  
31 consisting of 491 patients. Of those 491 patients, 201 (40.9%) had a critical failure in one of the  
32  
33 four images, 209 (42.6%) had critical failures in two of the four images, and 81 (16.5%) had  
34  
35 critical failures in either three or all four mammographic images. Additionally, 101 of the 491  
36  
37 patients (20.6%) had critical failures on the CC and MLO images on the same breast, meaning  
38  
39 that those patients had no acceptable images for one of the two breasts.  
40  
41  
42  
43

44  
45 Finally, in an exploratory descriptive analysis, we examined the variables associated  
46  
47 with passing the evaluation. Overall, a higher proportion of technologists working in high-  
48  
49 volume centres passed the evaluation, compared with technologists working in low-volume  
50  
51 centres (58.8% vs 32.0%, respectively). Technologists who received additional qualifications  
52  
53 also had a higher success rate than those who did not (69.0% vs 45.0%, respectively). There were  
54  
55  
56  
57  
58  
59  
60

1  
2  
3  
4  
5  
6  
7  
8  
9  
10  
11  
12  
13  
14  
15  
16  
17  
18  
19  
20  
21  
22  
23  
24  
25  
26  
27  
28  
29  
30  
31  
32  
33  
34  
35  
36  
37  
38  
39  
40  
41  
42  
43  
44  
45  
46  
47  
48  
49  
50  
51  
52  
53  
54  
55  
56  
57  
58  
59  
60

no marked differences according to geographic location of the centre (urban vs rural) and volume of mammograms performed by technologists.

Confidential

## INTERPRETATION

Our results indicate that 50% of technologists failed the professional inspection, where less than 9 out of 15 mammograms were scored as adequate. Overall, more than one-quarter of mammograms had critical failures on both CC images (27.5%). A similar proportion of mammograms also had critical failures on both MLO images (26.0%). Of the 1127 patients evaluated, 491 (43.6%) had a mammogram with at least one critical failure. Of those 491 patients, one-fifth (20.6%) had an entire breast with no adequate image.

### *Explanation of the Findings*

Three studies examining the quality of mammograms conducted as part of the Quebec Breast Cancer Screening Program have shown that improper breast positioning was the most common factor affecting the quality of mammography exams, which consisted of 22.6%, 37.2% and 55.0% of the 730, 197, and 1209 mammograms evaluated, respectively.(5, 8, 13) In our study, 43.6% of mammograms had critical failures due to improper positioning. Improper positioning can potentially lead to an inconclusive examination and a repeat mammographic exam for the patient, and thus it is important that it be adequately conducted.

There is some evidence suggesting that positioning training, rather than years of experience, might improve the quality of mammographic examination. A Dutch study evaluating the quality of breast positioning in newly-trained technologists compared with experienced technologists found that more newly-trained technologists had adequate breast positioning overall than experienced technologists on CC views (97% vs 86%) and MLO views (92% vs 84%).(14) In a Quebec study, technologists who underwent hands-on positioning training were more likely to have adequate quality of mammographic positioning than those who did not

1  
2  
3 (adjusted ratio 1.3, 95% CI: 1.1-1.5).(9) Another study found that more technologists met the  
4  
5 American College of Radiology criteria for quality breast positioning after undergoing  
6  
7 mammographic positioning training (80% vs 67%), which consisted of lectures, hands-on  
8  
9 training, and positioning coaching.(15)  
10  
11  
12  
13

#### 14 *Future Direction in the Area of Study*

15  
16  
17 Our study highlights that a significant number of technologists failed the inspection  
18  
19 despite having a certification in breast imaging. Therefore, it would be important for jurisdictions  
20  
21 or professional orders to re-assess whether the number of hours of mammography training for  
22  
23 technologists is sufficient, as well as the quality of such training. Our study also highlights that  
24  
25 patients with a critical failure on their mammographic exam might need to undergo a repeat  
26  
27 mammogram in order to be properly be evaluated. As mammographic exams with critical  
28  
29 failures may also lead to missed breast cancer cases, future studies with large sample sizes  
30  
31 should assess the impact of improper breast positioning on breast cancer incidence.  
32  
33  
34

35  
36 This study stems from an inspection ordered by the Ordre des technologues en imagerie  
37  
38 médicale, en radio-oncologie et en électrophysiologie médicale du Québec (OTIMROEPMQ).  
39  
40 Findings were shared with the professional order, which were subsequently presented to the  
41  
42 Quebec Ministry of Health and Social Services. Upon the findings, the professional order  
43  
44 temporarily stopped emitting new licenses to technologists until the development, in  
45  
46 collaboration with the Ministry, of a new education program for technologists with a specific  
47  
48 focus on positioning quality of mammograms.  
49  
50  
51  
52  
53  
54  
55  
56  
57  
58  
59  
60

### *Strengths and limitations*

Our study has strengths and limitations. Our stratified sampling strategy resulted in a representative sample of certified technologists currently practicing in Quebec. Furthermore, the quality assessment tool had a high concordance between the expert evaluators. However, as with all quality assessment tools, some subjectivity is inherently present. Finally, while our sample size enabled us to conduct a representative evaluation of the quality of mammographic positioning, it was not large enough to assess the impact of improper breast positioning on missed breast cancer cases.

### *Conclusions*

Our results suggest that half of the technologists failed the professional inspection, and a significant proportion of mammographic exams had critical failures in breast positioning. Our findings call for other jurisdictions to evaluate the quality of mammographic positioning to ensure that examinations are adequately performed, and to assess the need for additional training. The quality assessment tool helped better estimate this need. Finally, future studies should assess the impact of improper breast positioning on breast cancer detection.

## ACKNOWLEDGEMENTS

The authors wish to thank Josée Sirois, Guylaine Ouimet and Karine Morency for their evaluation of the mammograms.

## FUNDING

This work was supported by the Ordre des technologues en imagerie médicale, en radio-oncologie et en électrophysiologie médicale du Québec which commissioned iMD Institute for Medical Research to conduct the audit and analyze the data. JR is the recipient of a Doctoral Award from the Canadian Institutes of Health Research (FRN-152254) and the Fonds de recherche du Québec - Santé. LA holds a Chercheur-Boursier Senior Award from the Fonds de recherche du Québec – Santé and is the recipient of a William Dawson Scholar award from McGill University.

## DISCLOSURES

JR received consulting fees from Biogen for work unrelated to this study. LA received consulting fees from Janssen and Pfizer for work unrelated to this study.

**REFERENCES**

1. Canadian Cancer Statistics Advisory C. Canadian Cancer Statistics 2019. Toronto, ON: Canadian Cancer Society; 2019.
2. Fuller MS, Lee CI, Elmore JG. Breast cancer screening: an evidence-based update. *Med Clin North Am.* 2015;99(3):451-68.
3. Carney PA, Miglioretti DL, Yankaskas BC, Kerlikowske K, Rosenberg R, Rutter CM, et al. Individual and combined effects of age, breast density, and hormone replacement therapy use on the accuracy of screening mammography. *Ann Intern Med.* 2003;138(3):168-75.
4. Richli Meystre N, Henner A, Sa Dos Reis C, Strom B, Pires Jorge JA, Kukkes T, et al. Characterization of radiographers' mammography practice in five European countries: a pilot study. *Insights Imaging.* 2019;10(1):31.
5. Guertin MH, Theberge I, Zomahoun HTV, Dufresne MP, Pelletier E, Brisson J. Mammography Clinical Image Quality and the False Positive Rate in a Canadian Breast Cancer Screening Program. *Can Assoc Radiol J.* 2018;69(2):169-75.
6. Sweeney RI, Lewis SJ, Hogg P, McEntee MF. A review of mammographic positioning image quality criteria for the craniocaudal projection. *Br J Radiol.* 2018;91(1082):20170611.
7. Mercieca N, Portelli JL, Jadvá-Patel H. Mammographic image reject rate analysis and cause - A National Maltese Study. *Radiography (Lond).* 2017;23(1):25-31.
8. Guertin MH, Theberge I, Dufresne MP, Zomahoun HT, Major D, Tremblay R, et al. Clinical image quality in daily practice of breast cancer mammography screening. *Can Assoc Radiol J.* 2014;65(3):199-206.

- 1  
2  
3 9. Guertin MH, Theberge I, Zomahoun HT, Dufresne MP, Pelletier E, Brisson J.  
4  
5 Technologists' Characteristics and Quality of Positioning in Daily Practice in a Canadian  
6  
7 Breast Cancer Screening Program. *Acad Radiol*. 2016;23(11):1359-66.  
8  
9
- 10 10. Popli MB, Teotia R, Narang M, Krishna H. Breast Positioning during Mammography:  
11  
12 Mistakes to be Avoided. *Breast Cancer (Auckl)*. 2014;8:119-24.  
13
- 14 11. Reis C, Pascoal A, Sakellaris T, Koutaloni M. Quality assurance and quality control in  
15  
16 mammography: a review of available guidance worldwide. *Insights Imaging*.  
17  
18 2013;4(5):539-53.  
19  
20
- 21 12. Cancer CPA. *Quality Determinants of Breast Cancer Screening with Mammography in*  
22  
23 *Canada*. Toronto; 2013.  
24  
25
- 26 13. Theberge I, Guertin MH, Vandal N, Daigle JM, Dufresne MP, Wadden N, et al. Clinical  
27  
28 Image Quality and Sensitivity in an Organized Mammography Screening Program. *Can*  
29  
30 *Assoc Radiol J*. 2018;69(1):16-23.  
31  
32
- 33 14. Landsveld-Verhoeven C, den Heeten GJ, Timmers JM, Broeders MJ. [The correct  
34  
35 mammographic positioning in breast cancer screening]. *Ned Tijdschr Geneeskd*.  
36  
37 2015;159:A9488.  
38  
39
- 40 15. Pal S, Ikeda DM, Jesinger RA, Mickelsen LJ, Chen CA, Larson DB. Improving  
41  
42 Performance of Mammographic Breast Positioning in an Academic Radiology Practice.  
43  
44 *AJR Am J Roentgenol*. 2018;210(4):807-15.  
45  
46  
47  
48  
49  
50  
51  
52  
53  
54  
55  
56  
57  
58  
59  
60



**Table 1.** Characteristics of technologists

| <b>Characteristics</b>                                    |            |
|-----------------------------------------------------------|------------|
| Total, n (%)                                              | 76 (100.0) |
| Urban centre, n (%)                                       | 68 (89.5)  |
| High-volume centre, n (%) <sup>a</sup>                    | 51 (67.1)  |
| High annual volume of exams performed, n (%) <sup>b</sup> | 38 (50.0)  |
| Years of experience, n (%)                                |            |
| < 3 years                                                 | 4 (5.3)    |
| 3 - 14 years                                              | 42 (55.3)  |
| ≥ 15 years                                                | 30 (39.5)  |
| Continuing education, n (%)                               | 16 (21.1)  |

<sup>a</sup> A high-volume centre was defined as a centre performing  $\geq 2266$  annual mammography exams

<sup>b</sup> A high annual volume was defined as a technologist performing  $\geq 709$  mammographic exams per year

Confidential

**Table 2.** Baseline characteristics of patients

| <b>Baseline characteristics</b>                         |             |
|---------------------------------------------------------|-------------|
| Total, n (%)                                            | 1127 (100)  |
| Age, years, mean (SD) <sup>a</sup>                      | 58.7 (9.2)  |
| Body mass index, kg/m <sup>2</sup> , n (%) <sup>b</sup> | 25.3 (6.8)  |
| Modality, n (%)                                         |             |
| Computed radiography                                    | 446 (39.6)  |
| Digital radiography                                     | 679 (60.2)  |
| Missing                                                 | 2 (0.2)     |
| Type of exam, n (%)                                     |             |
| Bilateral mammogram, screening                          | 878 (77.9)  |
| Bilateral mammogram, diagnostic                         | 246 (21.8)  |
| Missing                                                 | 3 (0.3)     |
| Breast size, n (%)                                      |             |
| Small (<8 cm)                                           | 463 (41.1)  |
| Medium (8-14.9 cm)                                      | 593 (52.6)  |
| Large (>15 cm)                                          | 64 (5.9)    |
| Missing                                                 | 7 (0.6)     |
| Breast type, n (%)                                      |             |
| Regular                                                 | 1024 (90.8) |
| Implant                                                 | 49 (4.5)    |
| Scar                                                    | 22 (2.0)    |
| Other                                                   | 4 (0.4)     |
| Missing                                                 | 28 (2.5)    |
| Specific conditions                                     |             |
| None                                                    | 1069 (94.9) |
| Limited mobility (e.g., wheelchair)                     | 6 (0.5)     |
| Shoulder pain                                           | 6 (0.5)     |
| Sensitive/Very sensitive patient                        | 7 (0.6)     |
| Other                                                   | 2 (0.2)     |
| Missing                                                 | 37 (3.3)    |
| Cutaneous markers                                       | 157 (14.0)  |
| Images compared with previous exam                      | 929 (82.5)  |

Abbreviations: SD, standard deviation

<sup>a</sup> A total of 8 patients had missing data for age

<sup>b</sup> A total of 231 patients had missing data for body mass index

**Table 3.** Evaluation of breast positioning on CC view and MLO view

|                  | <b>Right-side images, n (%)</b> | <b>Left-side images, n (%)</b> | <b>Overall view, n (%)</b> |
|------------------|---------------------------------|--------------------------------|----------------------------|
| <b>CC view</b>   |                                 |                                |                            |
| Adequate         | 877 (77.8)                      | 915 (81.1)                     | 817 (72.5)                 |
| Critical failure | 250 (22.2)                      | 213 (18.9)                     | 310 (27.5)                 |
| Total            | 1127 (100.0)                    | 1127 (100.0)                   | 1127 (100.0)               |
| <b>MLO view</b>  |                                 |                                |                            |
| Adequate         | 902 (80.0)                      | 929 (82.4)                     | 834 (74.0)                 |
| Critical failure | 225 (20.0)                      | 198 (17.6)                     | 293 (26.0)                 |
| Total            | 1127 (100.0)                    | 1127 (100.0)                   | 1127 (100.0)               |

Abbreviations: CC, craniocaudal; MLO, mediolateral oblique

1  
2  
3  
4  
5  
6  
7  
8  
9  
10  
11  
12  
13  
14  
15  
16  
17  
18  
19  
20  
21  
22  
23  
24  
25  
26  
27  
28  
29  
30  
31  
32  
33  
34  
35  
36  
37  
38  
39  
40  
41  
42  
43  
44  
45  
46  
47  
48  
49  
50  
51  
52  
53  
54  
55  
56  
57  
58  
59  
60

**Table 4.** Global evaluation of breast positioning

|                  | <b>Overall CC view, n (%)</b> | <b>Overall MLO view, n (%)</b> | <b>Overall mammography, n (%)</b> |
|------------------|-------------------------------|--------------------------------|-----------------------------------|
| Adequate         | 817 (72.5)                    | 831 (74.0)                     | 636 (56.4)                        |
| Critical failure | 310 (27.5)                    | 293 (26.0)                     | 491 (43.6)                        |
| Total            | 1127 (100.0)                  | 1127 (100.0)                   | 1127 (100.0)                      |

Abbreviations: CC, craniocaudal; MLO, mediolateral oblique

Confidential

1  
2  
3  
4  
5  
6  
7  
8  
9  
10  
11  
12  
13  
14  
15  
16  
17  
18  
19  
20  
21  
22  
23  
24  
25  
26  
27  
28  
29  
30  
31  
32  
33  
34  
35  
36  
37  
38  
39  
40  
41  
42  
43  
44  
45  
46  
47  
48  
49  
50  
51  
52  
53  
54  
55  
56  
57  
58  
59  
60

**SUPPLEMENTARY MATERIAL**

**Evaluation of the quality of mammographic breast positioning in  
Quebec**

Confidential

1  
2  
3  
4  
5  
6  
7  
8  
9  
10  
11  
12  
13  
14  
15  
16  
17  
18  
19  
20  
21  
22  
23  
24  
25  
26  
27  
28  
29  
30  
31  
32  
33  
34  
35  
36  
37  
38  
39  
40  
41  
42  
43  
44  
45  
46  
47  
48  
49  
50  
51  
52  
53  
54  
55  
56  
57  
58  
59  
60

|                                |                                                                                                                                 |
|--------------------------------|---------------------------------------------------------------------------------------------------------------------------------|
| <b>Supplementary Methods 1</b> | Pilot evaluation of the tool                                                                                                    |
| <b>Supplementary Methods 2</b> | Reliability testing of the tool and results of concordance testing                                                              |
| <b>Supplementary Table 1</b>   | Number of mammograms with critical failures in a sample of 20<br>mammograms                                                     |
| <b>Supplementary Table 2</b>   | Results of concordance testing by position and view                                                                             |
| <b>Supplementary Table 3</b>   | Evaluation grid for positioning on CC view                                                                                      |
| <b>Supplementary Table 4</b>   | Evaluation grid for positioning on MLO view                                                                                     |
| <b>Supplementary Figure 1</b>  | Distribution of scores from evaluation of the quality of breast<br>positioning on CC view <b>(A)</b> and on MLO view <b>(B)</b> |
| <b>Supplementary Figure 2</b>  | Distribution of scores for global evaluation of breast positioning                                                              |

Confidential

## Supplementary Methods 1

A total of nine rounds of pilot evaluation were conducted to obtain the final version of the quality assessment tool.

In the first round, the objective was to create an exhaustive list of criteria for quality assessment in mammographic positioning. We conducted a review of the scientific literature to establish a list of criteria and searched standardized guidelines such as the American College of Radiology, the Canadian Association of Radiologists, and the European Commission Initiative on Breast Cancer. Criteria were compiled into a master list which included 16 criteria for CC views, 19 criteria for MLO views, and 15 criteria categorized in “Other”.

In the second round, the expert panel independently provided a set of criteria for the evaluation of the quality of mammographic positioning based on their professional experience and training. Criteria that were unanimously judged as non-essential for the evaluation of the quality of mammography were excluded from the master list.

In the third round, the objectives of the tool were to 1) construct a tool that would be used to evaluate mammograms that are adequate versus inadequate and 2) of the mammograms that are evaluated as adequate, create a more detailed evaluation grid based on the PGMI (Perfect, Good, Moderate, Inadequate) evaluation system.(1)

In the fourth round, each criterion and its response were revised by the expert panel for its relevance and clinical application, and criterion for which there were full agreement were included.

In the fifth and sixth rounds, responses to each criterion were condensed to avoid redundancy then re-organised hierarchically from best to worst response. This version of the tool included 8 criteria for CC view and 9 criteria for MLO view. A decision rule was also established to maximized inter-rater reliability. Each criterion was examined to establish the respective

1  
2  
3 response that would lead to a critical failure. The criteria for a critical failure were predefined to  
4 reduce subjectivity. For CC views, a mammogram was scored as a critical failure when answer 4  
5 was selected for criteria 2, 3, 4, 7 and 8, or when answer 2 was selected for criterion 5. For MLO  
6 views, a mammogram was scored as a critical failure when answer 4 was selected for criteria 2, 3,  
7 5, 7, 8 and 9, or when answer 3 was selected for criterion 4.  
8  
9

10  
11  
12 In the seventh and eighth rounds, the evaluation grid was independently tested by the expert  
13 panel on a sample of classic and complex mammograms (**Supplementary Methods 2**). The expert  
14 panel then met and discussed each mammogram and provided comments on the evaluation grid.  
15 Changes to the grid were made, which led to the final version (**Supplementary Table 3** for CC  
16 view and **Supplementary Table 4** for MLO view).  
17  
18  
19  
20  
21  
22  
23  
24  
25  
26  
27

## 28 **References**

- 29  
30  
31  
32  
33 1. Reis C, Pascoal A, Sakellaris T, Koutaloni M. Quality assurance and quality control in  
34 mammography: a review of available guidance worldwide. *Insights Imaging*.  
35 2013;4(5):539-53.  
36  
37  
38  
39  
40  
41  
42  
43  
44  
45  
46  
47  
48  
49  
50  
51  
52  
53  
54  
55  
56  
57  
58  
59  
60



## Supplementary Methods 2

To test the reliability of the tool, the three expert evaluators were asked to independently evaluate each mammogram independently and provide a score for the 4 images corresponding to each mammogram (right CC, left CC, right MLO, and left MLO). According to the predefined criteria, each of the 20 mammograms were then classified as acceptable or critical failure. The evaluator's responses were compiled into contingency tables to determine the percentage of agreement between evaluators. This was done for each of the 4 images, for both views, and for the overall mammogram. Failure of a single image in the right CC/MLO or left CC/MLO resulted in an overall failure in CC or in MLO, respectively. Ultimately, a mammogram was considered as critical failure if one of the two views (i.e. in CC or MLO) was scored as inadequate.

**Supplementary Table 1** presents the number and proportion of mammograms scored as critical failure by each evaluator. Evaluators 2 and 3 had a similar number of mammograms scored as critical failure, while Evaluator 1 had a higher number of mammograms scored as critical failure (15%, 20% and 35%, respectively).

**Supplementary Table 2** shows the degree of concordance between the evaluators for each view, each side and overall. This revealed a high level of agreement between the three evaluators, with concordance rates ranging from 75% to 100%, for an average concordance of 76.7%. The Cohen's kappa statistic for these images resulted in a  $k = 0.45$ , which corresponds to a moderate inter-rater agreement. To establish the final average reliability, the three evaluators received an additional set of 32 images, including 272 items. The final concordance was 97%, corresponding to a near-perfect agreement between the evaluators.

1  
2  
3  
4  
5  
6  
7  
8  
9  
10  
11  
12  
13  
14  
15  
16  
17  
18  
19  
20  
21  
22  
23  
24  
25  
26  
27  
28  
29  
30  
31  
32  
33  
34  
35  
36  
37  
38  
39  
40  
41  
42  
43  
44  
45  
46  
47  
48  
49  
50  
51  
52  
53  
54  
55  
56  
57  
58  
59  
60

**Supplementary Table 1.** Number of mammograms with critical failures in a sample of 20 mammograms

| <b>Evaluator</b> | <b>Mammograms with critical failures, n</b> | <b>% (95% confidence interval)</b> |
|------------------|---------------------------------------------|------------------------------------|
| 1                | 7                                           | 35 (18-57)                         |
| 2                | 3                                           | 15 (5-36)                          |
| 3                | 4                                           | 20 (8-42)                          |

Confidential

**Supplementary Table 2.** Results of concordance testing by position and view

| <b>Evaluator</b> | <b>Right CC</b> | <b>Left CC</b> | <b>Right MLO</b> | <b>Left MLO</b> | <b>Overall mammogram</b> |
|------------------|-----------------|----------------|------------------|-----------------|--------------------------|
| 1 vs 2           | 90%             | 75%            | 85%              | 95%             | 65%                      |
| 1 vs 3           | 90%             | 90%            | 85%              | 100%            | 85%                      |
| 2 vs 3           | 100%            | 85%            | 90%              | 90%             | 80%                      |

Abbreviations: CC, craniocaudal; MLO, mediolateral oblique

Confidential

Supplementary Table 3. Evaluation grid for positioning on CC view

| Positionnement CC                                                                                       | Réponse                                                                                                                                                                                                                                                                                                                                                                                                                                                                                                  |
|---------------------------------------------------------------------------------------------------------|----------------------------------------------------------------------------------------------------------------------------------------------------------------------------------------------------------------------------------------------------------------------------------------------------------------------------------------------------------------------------------------------------------------------------------------------------------------------------------------------------------|
| 1. Image évaluable                                                                                      | <input type="checkbox"/> Oui<br><input type="checkbox"/> Non, qualité de l'image inadéquate (i.e. qualité technique, implants mammaires, etc.)                                                                                                                                                                                                                                                                                                                                                           |
| 2. Partie du sein coupée                                                                                | <input type="checkbox"/> Non<br><input type="checkbox"/> Oui, mais seulement la peau coupée<br><input type="checkbox"/> Oui, tissu mammaire coupée, mais corrigé avec une image complémentaire<br><input type="checkbox"/> Oui, tissu mammaire coupée et pas corrigé avec une image complémentaire                                                                                                                                                                                                       |
| 3. Ligne du mamelon au corps est perpendiculaire au bord de l'image (partie interne et externe incluse) | <input type="checkbox"/> Oui<br><input type="checkbox"/> Non, mamelon désorienté (cause morphologique particulière ou autre cause) mais partie interne et externe incluse<br><input type="checkbox"/> Non, mamelon désorienté, partie interne et/ou externe non incluse, mais corrigé avec une image complémentaire<br><input type="checkbox"/> Non, mamelon désorienté, partie interne et/ou externe non incluses, et pas corrigé avec une image complémentaire                                         |
| 4. Bonne visualisation des tissus profonds                                                              | <input type="checkbox"/> Oui, avec graisse rétro-glandulaire<br><input type="checkbox"/> Oui, sein dense sans graisse rétro-glandulaire<br><input type="checkbox"/> Non, mais corrigé avec une image complémentaire<br><input type="checkbox"/> Non, et pas corrigé avec une image complémentaire                                                                                                                                                                                                        |
| 5. Ligne du mamelon au corps sur le CC est $\leq 1$ cm de la ligne du mamelon au pectoral sur le MLO    | <input type="checkbox"/> Oui<br><input type="checkbox"/> Non<br><input type="checkbox"/> Mesure non-applicable (ligne non valide sur le MLO)                                                                                                                                                                                                                                                                                                                                                             |
| 6. Mamelon vu de profil                                                                                 | <input type="checkbox"/> Oui<br><input type="checkbox"/> Non, mais aucune superposition avec le tissu glandulaire (rétro-aréolaire) ou indiqué avec un marqueur de plomb<br><input type="checkbox"/> Non, superposition avec le tissu glandulaire (rétro-aréolaire), mais corrigé avec une image complémentaire<br><input type="checkbox"/> Non, superposition avec le tissu glandulaire (rétro-aréolaire), et pas corrigé avec une image complémentaire ou non indiqué avec un marqueur de plomb ou pas |
| 7. Artéfacts et superposition (cheveux, bijoux, épaules, menton, image floue, etc.)                     | <input type="checkbox"/> Non<br><input type="checkbox"/> Oui, mais n'obstrue pas l'image<br><input type="checkbox"/> Oui, obstrue l'image, mais corrigé avec une image complémentaire<br><input type="checkbox"/> Oui, obstrue l'image, et pas corrigé avec une image complémentaire                                                                                                                                                                                                                     |
| 8. Plis de peau dans le sein (incluant plis causés par une cicatrice)                                   | <input type="checkbox"/> Non<br><input type="checkbox"/> Oui, mais n'obstrue pas l'image<br><input type="checkbox"/> Oui, obstrue l'image mais corrigé avec une image complémentaire<br><input type="checkbox"/> Oui, obstrue l'image et pas corrigé avec une image complémentaire                                                                                                                                                                                                                       |

Supplementary Table 4. Evaluation grid for positioning on MLO view

| Positionnement MLO                                                                                                                                | Réponse                                                                                                                                                                                                                                                                                                                                                                                                                                                                           |
|---------------------------------------------------------------------------------------------------------------------------------------------------|-----------------------------------------------------------------------------------------------------------------------------------------------------------------------------------------------------------------------------------------------------------------------------------------------------------------------------------------------------------------------------------------------------------------------------------------------------------------------------------|
| 1. Image évaluable                                                                                                                                | <input type="checkbox"/> Oui<br><input type="checkbox"/> Non, qualité d'image inadéquate (i.e. qualité technique, implants mammaires, etc.)                                                                                                                                                                                                                                                                                                                                       |
| 2. Partie du sein coupée                                                                                                                          | <input type="checkbox"/> Non<br><input type="checkbox"/> Oui, mais seulement la peau coupée<br><input type="checkbox"/> Oui, tissu mammaire coupé, mais corrigé avec une image complémentaire<br><input type="checkbox"/> Oui, tissu mammaire coupé et pas corrigé avec une image complémentaire                                                                                                                                                                                  |
| 3. Bonne visualisation des tissus profonds                                                                                                        | <input type="checkbox"/> Oui, avec graisse rétro-glandulaire<br><input type="checkbox"/> Oui, sein dense sans graisse rétro-glandulaire<br><input type="checkbox"/> Non, mais corrigé avec une image complémentaire <u>ou</u> acceptable selon la morphologie de la patiente ou autres causes<br><input type="checkbox"/> Non, et pas corrigé avec une image complémentaire                                                                                                       |
| 4. Quantité adéquate de muscle pectoral sur l'image (le bord inférieur du muscle pectoral se situe près de la ligne mamelon-pectoral ou plus bas) | <input type="checkbox"/> Oui<br><input type="checkbox"/> Non, mais acceptable selon la morphologie de la patiente (ex: réduction mammaire ou autres causes)<br><input type="checkbox"/> Non, inacceptable                                                                                                                                                                                                                                                                         |
| 5. Vue de la largeur maximale du muscle pectoral (muscle à angle)                                                                                 | <input type="checkbox"/> Oui<br><input type="checkbox"/> Non, mais acceptable selon la morphologie de la patiente ou autres causes<br><input type="checkbox"/> Non, mais corrigé avec une image complémentaire<br><input type="checkbox"/> Non, et pas corrigé avec une image complémentaire                                                                                                                                                                                      |
| 6. Mamelon vu de profil                                                                                                                           | <input type="checkbox"/> Oui<br><input type="checkbox"/> Non, mais aucune superposition avec le tissu glandulaire (rétro-aréolaire) ou indiqué avec un marqueur de plomb ou non<br><input type="checkbox"/> Non, superposition avec le tissu glandulaire (rétro-aréolaire), mais corrigé avec une image complémentaire<br><input type="checkbox"/> Non, superposition avec le tissu glandulaire (rétro-aréolaire), et pas corrigé avec une image complémentaire ou marqueur de Pb |
| 7. Angle infra-mammaire bien ouvert et démontré (ex. sein bien soulevé et non-affaissé)                                                           | <input type="checkbox"/> Oui<br><input type="checkbox"/> Non, mais le tissu mammaire est démontré<br><input type="checkbox"/> Non, le tissu mammaire n'est pas démontré, mais corrigé avec une image complémentaire<br><input type="checkbox"/> Non, le tissu mammaire n'est pas démontré et pas corrigé avec une image complémentaire                                                                                                                                            |
| 8. Artéfacts et superposition (muscle dorsale, cheveux, bijoux, épaules, menton, image floue, etc.)                                               | <input type="checkbox"/> Non<br><input type="checkbox"/> Oui, mais n'obstrue pas l'image<br><input type="checkbox"/> Oui, obstrue l'image, mais corrigé avec une image complémentaire<br><input type="checkbox"/> Oui, obstrue l'image et pas corrigé avec une image complémentaire                                                                                                                                                                                               |
| 9. Plis de peau dans le sein (incluant plis causés par une cicatrice)                                                                             | <input type="checkbox"/> Non<br><input type="checkbox"/> Oui, mais n'obstrue pas l'image<br><input type="checkbox"/> Oui, obstrue l'image mais corrigé avec une image complémentaire<br><input type="checkbox"/> Oui, obstrue l'image et pas corrigé avec une image complémentaire                                                                                                                                                                                                |

1  
2  
3  
4  
5  
6  
7  
8  
9  
10  
11  
12  
13  
14  
15  
16  
17  
18  
19  
20  
21  
22  
23  
24  
25  
26  
27  
28  
29  
30  
31  
32  
33  
34  
35  
36  
37  
38  
39  
40  
41  
42  
43  
44  
45  
46  
47  
48  
49  
50  
51  
52  
53  
54  
55  
56  
57  
58  
59  
60

**Supplementary Figure 1.** Distribution of scores from evaluation of the quality of breast positioning on CC view (A) and on MLO view (B)

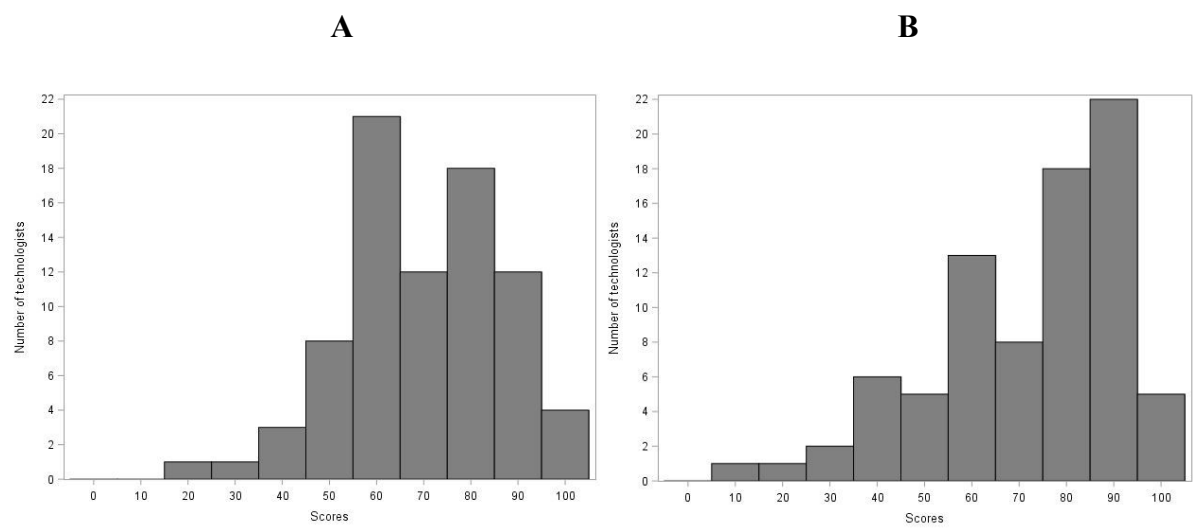

Confidential

Supplementary Figure 2. Distribution of scores for global evaluation of breast positioning

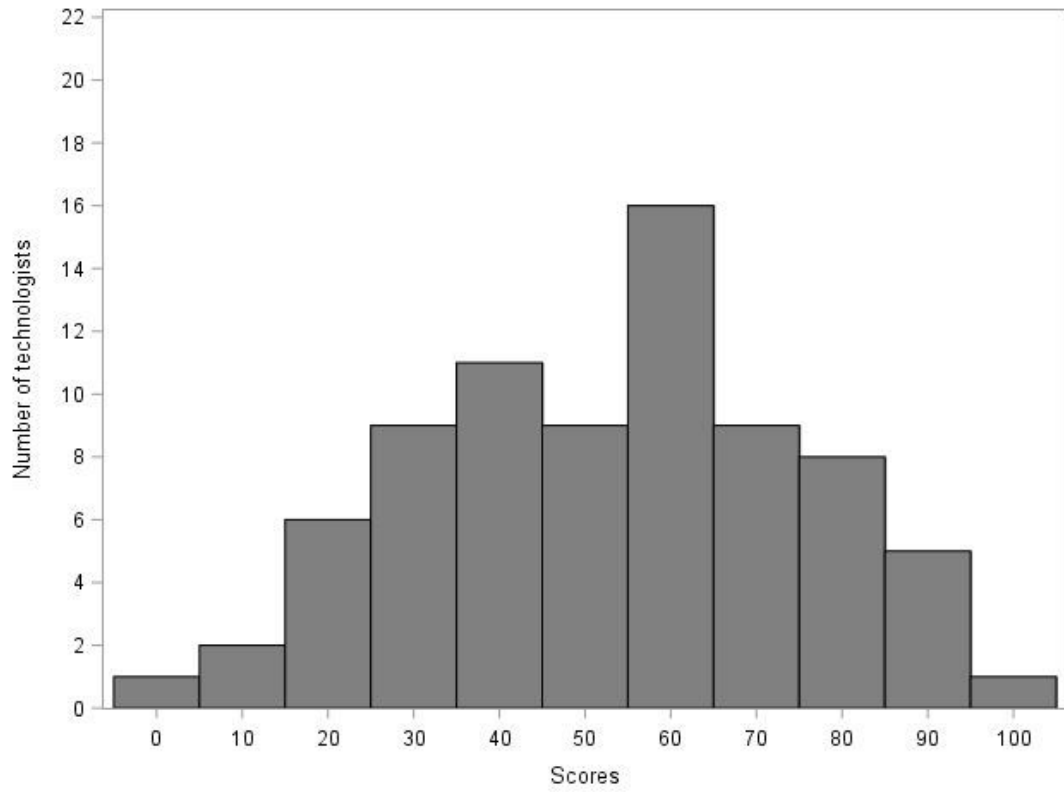

Supplement: 2020-0211-original-submission.pdf [file 2020-0211-original-submission.pdf]
